# Supplementary material for: Radiative sensitivity quantified by a new set of radiation flux kernels based on the ERA5 reanalysis
Source: Copernicus journal article supplement (doi:10.5194/essd-2022-474), 2023-02-10
Supplement: Supplementary file [file essd-2022-474-AC1-supplement.pdf]

## Response to Reviewer Comments

1  
2  
3  
4  
5  
6  
7

We thank the reviewer for thoughtful and helpful comments. Below are our responses (in regular font) to the comments (in ***bolded italic*** font).

8 **Reviewer #1:**  
9 **Review of “Radiative sensitivity quantified by a new set of radiation flux kernels based on the**  
10 **ERA5 reanalysis”**

11 **By Huang and Huang**

12 **essd-2022-474**

13 **Summary**

14

15 ***Radiative kernels, which quantify the impact of unit changes in individual fields on radiative***  
16 ***fluxes, have become a key tool in diagnosing radiative feedbacks both in climate models and in***  
17 ***observations. In this study the authors develop a new set of radiative kernels using***  
18 ***atmospheric and surface fields from the ERA5 reanalysis as inputs to the RRTMG radiation***  
19 ***code. Unlike many previous kernels, they generate kernels for both the top-of-atmosphere***  
20 ***(TOA) and the surface (SFC) such that impacts of changes in temperature, humidity, clouds,***  
21 ***and surface albedo on surface radiation can be diagnosed. The ERA5 kernels are compared***  
22 ***with previously generated kernels, and inter-kernel differences are illuminated. The authors***  
23 ***also explore the degree to which the derived kernels depend on the state of the climate, with***  
24 ***input data from years impacted by El Nino events or with anomalous sea ice concentration***  
25 ***resulting in kernels of different strength.***

26

27 ***Overall I find the analysis to be solid and the presentation to be mostly clear. I have some***  
28 ***suggestions for improving the readability of the paper and for presenting the relative***  
29 ***importance of inter-kernel versus inter-model feedback differences. I also would like the***  
30 ***authors to provide more evidence of the quality of this new kernel versus existing kernels. I***  
31 ***recommend acceptance pending minor revision, as detailed below.***

32

33 **Mark Zelinka**

34

35 **Major Comments**

36

37 ***• Abstract: Since the goals of this data journal are to publish work that documents useful***  
38 ***datasets, with the scientific results being secondary, I felt that the abstract spent too much time***  
39 ***on the inter-kernel comparison and not enough on the evaluation of the specific ERA5 kernels***  
40 ***developed here. For example, it would be good to know in the abstract whether the new***  
41 ***kernels have smaller residuals in the global mean or regionally than previous kernels. The***  
42 ***bulk of the abstract describes results from all kernels collectively rather than focusing on the***  
43 ***ERA5 kernels.***

44

45 **Revised.** ERA5 TOA kernels are as good as other kernel datasets while for surface kernels,  
46 ERA5 kernels show better performance, in terms of the radiative sensitivity and radiation closure  
47 test. The revised abstract emphasized this point.

48

49 ***• The paper discusses TOA and SFC kernels but does not discuss the implied atmospheric***  
50 ***kernels, derived via differencing the TOA and SFC kernels. Perhaps this would make the***  
51 ***paper too long, but the authors might consider adding something on ATM kernels.***

52

53 Agreed: the ATM kernels are as important as TOA and SFC kernels. Considering the length and  
54 readability of the manuscript, we added ATM kernel results in the supplement.

55  
56 • **Organization of the figures:** *I found it to be really taxing and distracting to have to jump  
57 between eight large figures on separate pages during Sections 3.1 to 3.2.*

58 *Section 3.1 discusses the ERA5 kernels in isolation. I think it would be more logical to  
59 have the first figure or two just show all the ERA5 kernels. This would include the first  
60 column of Figs 1-8, which is 32 panels. Perhaps you could have 2 figures with 4 rows and 4  
61 columns each. This way a reader can see all of the new kernels just by looking at 2 figures,  
62 and can more easily match the discussion in Section 3.1 with the individual figure panels  
63 being discussed without flipping between 8 pages. If you do this, I suggest re-labeling so it is  
64 obvious above each panel what one is looking at (i.e., “All-sky SFC Air Temperature Kernel”,  
65 “Clear-sky TOA LW Water Vapor Kernel”, etc.)*

66 *Section 3.2 discusses the inter-kernel comparison, which refers solely to the two right  
67 columns of Figs 1-8. I would suggest making these their own figures. Perhaps some of this  
68 material could go in supporting information or the appendix, if you don’t spend much time  
69 discussing it. Given the choice of journal, the focus of this manuscript should be to present  
70 and evaluate the new dataset, so this intercomparison is somewhat superfluous as it currently  
71 stands. It might be worth doing a more rigorous evaluation of ERA5 against other datasets  
72 rather than this discussion of the kernel differences collectively.*

73  
74 We reorganized the figures, with the ERA5 kernel now shown in Figure 1-2 and the comparison  
75 with other datasets in Figure 3-4. We keep the comparison of all kernel datasets in Section 3.2  
76 (e.g., the fractional discrepancies) as oppose the difference of ERA5 kernels against other  
77 datasets, as there is no truth value to be compared with and the point in this section is to show  
78 where these datasets differ most, and indeed the comparison reveals some issues in current SFC  
79 kernels.

80  
81 • **Multi-kernel dataset:** *Have you considered doing the community service of placing the  
82 common-gridded multi-kernel dataset discussed on lines 294-296 on a public website?*

83  
84 We added it in the data repository.

85  
86 • **Throughout:** *The inter-kernel differences are referred to as “biases”. Perhaps the authors  
87 are referring to the fact that all model-based kernels have a biased mean-state with respect to  
88 observations, but I think this verbiage is misleading. Also, the definition in L306 quantifies the  
89 bias with respect to the multi-kernel average, implying that the multi-kernel average is truth.  
90 The inter-kernel differences are a mix of model differences (in mean-state, radiation codes,  
91 etc.) and possibly the influence of actual biases (like the issues identified here in the HadGEM  
92 and Oslo kernels). If a kernel were to be built from a preindustrial control state, it may be less  
93 biased for computing feedbacks with respect to that state than the ERA5 kernels developed  
94 here; it depends on the context whether a given kernel is biased. I suggest changing all  
95 instances of “bias” to “differences” unless it can be shown to be a true bias with respect to a  
96 correct value.*

97

98 Revised. In equation (2), we use the multi-kernel mean as a reference value to illustrate how the  
99 kernel values vary among dataset, rather than deeming it as a “truth” value. We add a note in  
100 Line 279-280 to explain it.

101  
102 • *Tables 3-6: Could these results be presented more effectively? I’m not sure how insightful it*  
103 *is to present all the individual model results in four big tables. The message you are trying to*  
104 *convey is the relative importance of inter-kernel differences versus inter-model differences in*  
105 *SFC and TOA feedbacks, either broken down into LW, SW, and net, or into individual*  
106 *feedback components. I wonder if something analogous to Figure 1 of Chao and Dessler*  
107 *(2021) might be more effective. In this case, you would show the spread in each feedback from*  
108 *inter-kernel vs inter-model differences. Or would simply showing a figure comparing inter-*  
109 *kernel and inter-model standard deviations (ignoring the multi-model mean values) be more*  
110 *effective? Deciding on the most important points and then creating a figure that supports*  
111 *those points clearly would be worthwhile. Right now it is a bit hard for the reader to wade*  
112 *through these four big tables and extract the messages.*

113  
114 We reorganized these results and put the tables of component feedback parameters to the  
115 supplement for readers who are interested and used figure 8 and 10 to show the relatively larger  
116 inter-model difference than inter-kernel difference.

117  
118 • *In the end it is still a little unclear to me whether the new ERA5 kernel has a smaller*  
119 *residual than the other kernels. Can you make a stronger case for why we need this new*  
120 *kernel, and whether it is more accurate? Figures 11 and 12 suggest to me that the residuals*  
121 *are comparable to previous kernels; but this should be noted explicitly. If it is not more*  
122 *accurate, why should I use it over previous kernels? If it is more accurate, do you advocate*  
123 *that the community use this instead of the others? I think it is well established here and*  
124 *elsewhere that the inter-kernel differences are small relative to inter-model spread; why are we*  
125 *regularly making new kernels in this case?*

126  
127 We added more emphasis on the accuracy of this newly generated datasets in the abstract and  
128 conclusion. In short, ERA5 TOA kernels are as good as other datasets but ERA5 surface kernels  
129 show improved performance compared with others (e.g., Figure 10). This is possibly caused by  
130 how the surface kernels are calculated and averaged, e.g., concerning the issues of surface flux  
131 kernels of atmospheric temperature. We also emphasized the importance of the consideration of  
132 surface pressure when vertically integrating the atmospheric contributions.

### 133 134 **Minor Comments**

135  
136 • *Verbiage: Throughout the paper, I found some of the verbiage to be unnecessarily*  
137 *longwinded. Could “kernel of the surface flux” be the “surface kernel”, for example?*

138 Revised

139  
140 • *L22: “in” should be “for”*

141 Corrected.

142

143 • **L32:** *I don't understand what is meant by "inter-kernel bias-induced uncertainty", which*  
144 *appears in slightly modified phrasing in other places as well (L557). Is this just "inter-kernel*  
145 *differences"?*  
146 Corrected.  
147  
148 • **L38:** *delete "on the other hand"*  
149 Corrected.  
150  
151 • **L60:** *suggest also citing the recent work of Chao and Dessler (2021)*  
152 Added  
153  
154 • **L75:** *Suggest citing some additional work, some of which includes surface and atmosphere*  
155 *cloud radiative kernels (Zhang et al., 2021; Zhou et al., 2022, 2013)*  
156 Added  
157  
158 • **L81:** *suggest specifying "largely insensitive"*  
159 Clarified.  
160  
161 • **L83:** *"are" should be "is"*  
162 Corrected  
163  
164 • **L107:** *suggest simplifying to "we intercompare"*  
165 Revised  
166  
167 • **L109-111:** *suggest rephrasing this sentence, which I found hard to parse. Also, you probably*  
168 *want to specify that you are comparing across-model vs across-kernel differences in this*  
169 *sentence (I think)*  
170 Revised  
171  
172 • **L150-152:** *I'm confused by how you describe the analysis. I thought kernels were*  
173 *constructed using one experiment, performing many calls to the radiative transfer code, each*  
174 *time with a single field / level / location perturbed. This is not how the procedure is described*  
175 *here.*  
176 Clarified.  
177  
178 • **L168-169:** *Probably want to remind the reader why the factors of 4 and 8 are present in these*  
179 *expressions. It is because the radiation calculations are done 4- or 8-times daily, I think.*  
180 Added.  
181  
182 • **L168:** *"kernels" should be singular*  
183 Corrected.  
184  
185 • **L190:** *suggest "upwelling" instead of "outgoing". Also, suggest simplifying to "the kernel is*  
186 *negative"*  
187 Revised.  
188

189 • **L206: should be “(f,l)” rather than “(g,l)”**  
190 Corrected.  
191  
192 • **L253: “reduce” should be plural**  
193 Corrected.  
194  
195 • **L257: I think you should specify that you are talking about the clear-sky TOA kernel here.**  
196 Added.  
197  
198 • **L336: “by the inconsistency in” should be “by inconsistencies in”**  
199 Corrected.  
200  
201 • **L343-344: could this be simplified to “state-dependency in the kernels”?**  
202 Revised.  
203  
204 • **L354-355: “the” before “interannual” and “cloudiness” is not needed**  
205 Corrected.  
206  
207 • **L359: what is meant by “seasonal SST anomalies” Previously, it is stated that you are**  
208 **examining annual means.**  
209 Revised.  
210  
211 • **L363: “since” should be “in the”**  
212 Corrected.  
213  
214 • **L364: “exemplify” should be “illustrate” or “highlight”**  
215 Corrected.  
216  
217 • **L365: All sky what? Kernels?**  
218 Revised.  
219  
220 • **L370: I think some explanation of this result is warranted. Why does Figure 9e have that**  
221 **structure, wherein some regions that are moister and cloudier have a larger SW WV kernel**  
222 **but some do not (NE Pacific). Also, the panel titles in Figure 9 are a little ambiguous; suggest**  
223 **explicitly stating what is shown in each.**  
224 Corrected.  
225  
226 • **Figure 10: suggest deleting the longitude labels which clutter the figure and seem**  
227 **unnecessary given the provided coastlines.**  
228 We think this is fine.  
229  
230 • **L385-394: More explanation of why you get these results is needed. Also, this is too long of a**  
231 **sentence.**  
232 Revised.  
233

234 • **L390-394: Is one of the take-aways here that it may be necessary to average over multiple**  
235 **years when constructing kernels? Or at least that one has to be careful not to choose a year**  
236 **with an extreme Nino index or huge sea ice anomalies when constructing kernels? You might**  
237 **consider making this point explicitly.**  
238 Yes, added.  
239

240 • **L403: missing space between “Table” and “2”**  
241 Corrected.  
242

243 • **Table 2: “model top level” is not an accurate description of what is reported in that column**  
244 Revised.  
245

246 • **L412-419: I think more description and motivation for using these experiments is needed.**  
247 **The abrupt-4xCO2 experiment is a fully-coupled experiment whereas piClim-4xCO2 is an**  
248 **atmosphere-only experiment. You should also cite the relevant piClim-4xCO2 experiment**  
249 **description paper (Pincus et al., 2016). I’ve never seen these two experiments differenced in**  
250 **order to derive the temperature-mediated responses without the confounding effects of rapid**  
251 **adjustments; this is clever although it limits the number of models available to analyze.**  
252 **(Although more than just 6 models are available as far as I can tell.) I suggest explaining**  
253 **these choices a little better. I would also suggest mentioning this methodological difference**  
254 **when coming your values to those of Zelinka et al (2020) – that study used piControl**  
255 **simulations as the baseline and computed abrupt-4xCO2 anomalies and feedbacks differently.**  
256 **It is reassuring that the results of the two approaches agree as well as they do.**  
257 Added.  
258

259 • **L445-446: The end of this sentence is redundant with previous statements; suggest deleting.**  
260 We think it is fine.  
261 • **L460, L467: small relative to what?**  
262 Added. Compared with the total feedback.  
263 • **L477: Suggest stating the name of the row rather than making the reader count.**  
264 Revised.  
265 • **L478-480: suggest citing some examples to explain how you arrive at these percentage**  
266 **numbers. Are you comparing inter-kernel standard deviations to inter-model standard**  
267 **deviations?**  
268 Revised.  
269 • **L488: these numbers seem misleading, because most feedbacks have roughly the same**  
270 **absolute value of inter-kernel spread; they just vary in the central value. If all feedbacks had**  
271 **the same inter-kernel spread, but one feedback happened to be zero (e.g., if the SW cloud**  
272 **amount feedback perfectly compensated a SW cloud albedo feedback), the inter-kernel spread**  
273 **relative to this would be infinite, but that is not really meaningful.**  
274 Revised.  
275

276 • **L541: Delete “First of all”**  
277 Deleted  
278

279 • **L583: This sentence seems to run on and should probably be broken up for clarity.**

280 Revised.  
281 • **L585-591: this sentence is also way too long and should be broken up**  
282 Revised.  
283 • **L594: “it is especially noticed that” can be deleted**  
284 Deleted.  
285 • **L599-600: suggest making this more concise by removing redundancy**  
286 Revised.  
287 • **L601-602: How could inter-model spread come from inter-kernel spread? Please rephrase.**  
288 Corrected.  
289 • **L603: rephrase to “finding is consistent with previous”**  
290 Revised.  
291 • **L762: specify whether this is an absolute or relative change. I’m pretty sure it is the former.**  
292 Added.  
293 • **L767: not sure what is meant by the last phrase**  
294 Revised.  
295 • **L818: “trickiness” is probably too informal; suggest “challenge”**  
296 Revised.  
297 • **L835: I don’t understand what is meant from “and accounting” onward**  
298 Revised.  
299 • **Figure A2: are these SFC or TOA kernels? I assume SFC.**  
300 Yes, added.  
301 • **L854: specify “in these cases”**  
302 Revised.

## 303 304 References

305 **Chao, L.-W., Dessler, A.E., 2021. An Assessment of Climate Feedbacks in Observations and**  
306 **Climate Models Using Different Energy Balance Frameworks. *J. Clim.* 34, 9763–9773.**  
307 **<https://doi.org/10.1175/JCLI-D-21-0226.1>**  
308 **Pincus, R., Forster, P.M., Stevens, B., 2016. The Radiative Forcing Model Intercomparison**  
309 **Project (RFMIP): experimental protocol for CMIP6. *Geosci. Model Dev.* 9, 3447–3460.**  
310 **<https://doi.org/10.5194/gmd-9-3447-2016>**  
311 **Zelinka, M.D., Myers, T.A., McCoy, D.T., Po-Chedley, S., Caldwell, P.M., Ceppi, P., Klein,**  
312 **S.A., Taylor, K.E., 2020. Causes of Higher Climate Sensitivity in CMIP6 Models.**  
313 ***Geophys. Res. Lett.* 47, e2019GL085782. <https://doi.org/10.1029/2019GL085782>**  
314 **Zhang, Y., Jin, Z., Sikand, M., 2021. The Top-of-Atmosphere, Surface and Atmospheric Cloud**  
315 **Radiative Kernels Based on ISCCP-H Datasets: Method and Evaluation. *J. Geophys.***  
316 ***Res. Atmospheres* 126, e2021JD035053. <https://doi.org/10.1029/2021JD035053>**  
317 **Zhou, C., Liu, Y., Wang, Q., 2022. Calculating the Climatology and Anomalies of Surface**  
318 **Cloud Radiative Effect Using Cloud Property Histograms and Cloud Radiative Kernels.**  
319 ***Adv. Atmospheric Sci.* 39, 2124–2136. <https://doi.org/10.1007/s00376-021-1166-z>**  
320 **Zhou, C., Zelinka, M.D., Dessler, A.E., Yang, P., 2013. An Analysis of the Short-Term Cloud**  
321 **Feedback Using MODIS Data. *J. Clim.* 26, 4803–4815. [https://doi.org/10.1175/JCLI-D-](https://doi.org/10.1175/JCLI-D-12-00547.1)**  
322 **12- 00547.1**

323  
324  
325
