# Supplementary material for: Radiative sensitivity quantified by a new set of radiation flux kernels based on the ERA5 reanalysis
Source: Copernicus journal article supplement (doi:10.5194/essd-2022-474), 2023-02-10
Supplement: Supplementary file [file essd-2022-474-AC3-supplement.pdf]

## Response to Reviewer Comments

1  
2  
3  
4  
5  
6  
7

We thank the reviewer for thoughtful and helpful comments. Below are our responses (in regular font) to the comments (in ***bolded italic*** font).

8 **Reviewer #3:**

9 *In this manuscript, the authors introduce a new set of all-sky and clear-sky, top-of-atmosphere*  
10 *(TOA) and surface radiative kernels, generated with the RRTMG radiative transfer model for*  
11 *5 years of input fields from ERA5 reanalysis data. The authors incorporate these kernels into*  
12 *a more general inter-comparison of the magnitude and structure of existing sets of radiative*  
13 *kernels, highlighting the sensitivity of radiative kernels to the input climate state fields used to*  
14 *compute them. Along these lines, they also highlight the sensitivity of radiative kernels to*  
15 *interannual variability in the climate state, taking advantage of the fact that the ERA5 kernels*  
16 *have been computed for 5 years of data, over a period with notable changes in ENSO and sea*  
17 *ice coverage.*

18  
19 *The manuscript is comprehensive and well written. More multi-kernel comparison analysis is*  
20 *certainly needed, so this will be a welcomed addition to the literature. However, I feel the*  
21 *paper suffers in a few ways by trying to balance all three tasks (introduce a new kernel, multi-*  
22 *kernel comparison, sensitivity of kernels to variability) in one paper. For instance, I think the*  
23 *analysis of inter-annual variability is the most valuable part of the work, but the analysis is not*  
24 *well connected to the multi-kernel comparison, and the analysis is not as in depth as it could*  
25 *be. Additionally, it's not clear why we need the ERA5 kernels when they don't seem all that*  
26 *different from the others, and the kernels based on ERA-Interim reanalysis data (ERAi)*  
27 *previously developed by the second author of this paper were also calculated for 5 years of*  
28 *data and could have been used for the inter-annual variability analysis instead. Given the*  
29 *journal, I think justifying the new data product is important. My comments below reflect these*  
30 *concerns and hopefully add some additional, useful explanation to my points. Given these, I*  
31 *think the paper deserves consideration for publication, pending major revisions.*

32 **Ryan Kramer**

33  
34 **General**

35 *1) As noted above, some additional justification for producing the ERA5 kernels is necessary,*  
36 *particularly given that the ERAi kernels exist, which use similar input data and a similar*  
37 *radiative transfer code, also for 5 years of data. For example, is the improvement of RRTMG*  
38 *(ERA5 kernels) over RRTM (the ERAi kernels) large enough to warrant new kernels? Even if*  
39 *so, the sensitivity of kernels to RT is not really a focus of the analysis here. Does ERA5 have*  
40 *more realistic climate state fields than ERAi? The two kernels were computed over different*  
41 *periods, so maybe that is reason to make new kernels? But the period for the ERAi kernels*  
42 *(2008-2012) also has notable swings in ENSO, so I don't quite see the advantage of the later*  
43 *period used for ERA5 kernels.*

44 *1a) Related, what is the justification for developing radiative kernels from reanalysis*  
45 *when the fields are available from models and observations? Arguably reanalysis offers a*  
46 *happy middle between the two. They may not be pure observations, but they do have the full*  
47 *diurnal cycle that most satellite observations do not have. This may be important for*  
48 *diagnosing feedbacks in models, where the model fluxes are also a response to the full diurnal*  
49 *cycle. But there is also the argument that, in order to diagnose the true feedback, model*  
50 *feedbacks should be diagnosed with a kernel developed from models and observed feedbacks*  
51 *should be diagnosed with appropriate observations. What is the value of reanalysis-based*  
52 *kernels in that context? Some discussion along these lines would be really valuable to a*  
53 *community often confused about what kernels they should be using.*

54

55 Following these suggestions, revisions are made to emphasize the strength of this newly  
56 generated ERA5 kernel in the abstract and conclusion. As suggested by the comparison and  
57 figures in the manuscript, ERA5 TOA kernels are as good as other datasets. Though for surface  
58 kernels, it shows better performance than other datasets. These points are added in the revised  
59 manuscript.

60

61 Many studies have shown the superior performance of ERA5 compared with other reanalysis,  
62 including its older version - ERAi reanalysis. We used this reanalysis for better representation of  
63 the real atmosphere and recommend using ERA5 kernels for feedback analysis. Compared with  
64 the satellite observation, as the reviewer mentioned, the strength of reanalysis dataset is that it  
65 includes the full diurnal cycle and is not limited by the detection of near-surface layers. For  
66 example, although the CloudSat kernels show great performance for TOA radiation budget, some  
67 of its surface kernels show underestimated strength from the bottom atmospheric layers possibly  
68 due to the difficulty of satellite in detecting low atmosphere information.

69

70 It is verified here that the TOA radiative kernels show little discrepancies among the datasets and  
71 use of a reanalysis based kernel can well quantify the radiative feedbacks in GCMs. But the same  
72 cannot be said about the current surface kernels as illustrated by Figure 9 and 10. More  
73 discussion is added in the manuscript to underline this point.

74

75 ***2) This may be the only example where an “older” (ERAi) and “updated” (ERA5) radiative***  
76 ***kernel were developed by the same research group using similar RT codes. This could be a***  
77 ***really powerful tool for the multi-kernel comparison analysis and should be exploited here,***  
78 ***but has not been yet. If the second author still has access to the ERAi kernel input data, I***  
79 ***would like this team to include a more in-depth comparison of the ERAi and ERA5 kernels in***  
80 ***the context of the multi-kernel intercomparison. Throughout the current manuscript, the***  
81 ***authors highlight examples of large multi-kernel differences, tying them to potential***  
82 ***differences in the underlying climate input data. For a given example, is the spread also***  
83 ***evident in differences between the ERAi and ERA5 kernels? If so, the authors should analyze***  
84 ***the climate input fields directly to reveal specifics about why the kernels differ. A few specific***  
85 ***comments in the section below try to prompt this type of analysis. Among other groups, I think***  
86 ***this could be extremely useful for the ECMWF developers of ERAi and ERA5, who are always***  
87 ***trying to understand the biases and limitations of their product, giving your work exposure to***  
88 ***an additional, large community.***

89

90 Yes, we added the comparison between ERA5 and ERAi kernel in Figure 5. In general, the  
91 differences between these two kernels are smaller than the interannual variation of ERA5  
92 kernels, except for WV SW kernel, which is largely affected by the difference in cloud and water  
93 vapor fields between ERA5 and ERAi.

94

95 ***3) Section 3.1: The authors should rethink the presentation and the focus of discussion in this***  
96 ***section. First, general descriptions of the sign, basic explanation of the causes of the sign, and***  
97 ***the zonal-mean vertical structure of kernels are discussed here for the new ERA5 kernels, but***  
98 ***these topics have been covered extensively for other kernels and the new kernels don't seem to***  
99 ***deviate from that. Therefore, it seems redundant to repeat that information here. This is true***

100 *even for surface radiative kernels, where the structure and sign were covered by Kramer et al.*  
101 *2019 a and b (see refs below). The description of the horizontal spatial structure of the kernels*  
102 *is newer however, and worthy of focus in this section. Second, the number of figures and*  
103 *figure panels in this section is also overwhelming for the reader and should be consolidated.*

104 *Given these points, I would instead:*

105 *-For Figures 1-8, make the first figure or two just the spatial maps of each kernel, with a title*  
106 *for each subplot that describes which kernel we are looking at (e.g. all sky, surface temp,*  
107 *clear-sky SW WV, etc.).*

108 *-Given their prevalence elsewhere (e.g. Soden et al. 2008; Block and Mauritsen 2013; Kramer*  
109 *et al. 2019a,b, Smith et al. 2021), the latitude-pressure subplots of the ERA5 kernels can be*  
110 *combined and put in supplemental material. -Any subplot currently referring to the*  
111 *intercomparison across existing kernels should be saved for new, separate figures placed in*  
112 *Section 3.2, where that material is discussed in the text.*

113

114 *This above list is just a recommendation. I'm sure there are other ways of reorganizing the*  
115 *plots to improve manuscript readability, but some reorganization is necessary.*

116

117 *Kramer, R. J., A. V. Matus, B. J. Soden, and T. S. L'Ecuyer, 2019: ObservaDon-Based*  
118 *Radiative Kernels From CloudSat/CALIPSO. JGR Atmospheres, 124, 5431–5444,*  
119 *<https://doi.org/10.1029/2018jd029021>.*

120 *Kramer, R. J., B. J. Soden, and A. G. Pendergrass, 2019: Evaluating Climate Model*  
121 *Simulations of the Radiative Forcing and Radiative Response at Earth's Surface.*  
122 *Journal of Climate, 32, 4089– 4102, [hTps://doi.org/10.1175/jcli-d-18-0137.1](https://doi.org/10.1175/jcli-d-18-0137.1).*

123

124 For the completeness of the description, we kept the descriptions of the sign, basic explanation  
125 and the vertical structure of radiative kernels, so that the readers who are not familiar with  
126 radiative kernels have the basic information. We kept the results in all-sky in the main text and  
127 moved the clear-sky result to the supplement for better readability.

128

129 *4) It is evident that clouds play an important role in determining the spatial pattern of the all-*  
130 *sky radiative kernels. More description of the type of clouds impacting the kernels would be*  
131 *very useful and novel. For example, cloud vertical extent? Cloud base height (for sfc kernels)?*  
132 *Optical properties? A deeper analysis of the ERA5 cloud fields would be helpful here. And if*  
133 *the fields are still available for the ERAi kernels, even better.*

134

135 Cloud information is documented in Line 122 and 128. As cloud fraction and cloud liquid/ice  
136 water content data are from ERA5, they are of the same resolution as other variables (2.5\*2.5, 37  
137 level), extending from 1hPa to 1000hPa. Cloud droplet radii are from CERES 3-hourly dataset  
138 (1\*1) and then interpolated to the same resolution as ERA5 data.

139

140 *5) I think the analysis of inter-annual variability in the kernel is the most interesting*  
141 *contribution of this paper to the literature. It deserves a more prominent place in the title,*  
142 *abstract, and conclusion section.*

143

144 Following this suggestion, we strengthened various aspects of the paper concerning the  
145 interannual variability. These responses are detailed below in the responses to the specific  
146 comments related to this topic.

147

148 ***6) The inter-annual variability analysis feels disjointed from the introduction of the new***  
149 ***kernels in Section 3.1, the multi-kernel comparison, and the feedback estimate section. It is***  
150 ***evident that the ERA5 kernels are sensitive to inter-annual variability, but does this really***  
151 ***matter for overall kernel spread? For instance, the ERA5 all-sky TOA Ts kernel is clearly***  
152 ***sensitive to interannual variability in the Eq. Pacific at ~Longitude 180, but this doesn't***  
153 ***appear to be a particularly noteworthy area of inter-kernel differences in fig 1e. It may very***  
154 ***well be important, but the analysis at present doesn't offer enough of a connection to make***  
155 ***that point. Comparing the inter-annual variability in the ERA5 vs ERAi kernels in more detail***  
156 ***may be a useful starting point to help make the connection between this section and the others.***  
157

158

158 Both inter-kernel difference and interannual difference of kernel values reflect the dependence of  
159 radiative sensitivity on background atmospheric states. We showed this point using the  
160 comparison among different kernel datasets first and then used the interannual variability of  
161 ERA5 kernel to further show how the change in atmospheric state (e.g., during ENSO or due to  
162 sea ice change) impacts the radiative sensitivity, given that these variables from ERA5 are  
163 available and used in our calculation.

164

165 The interannual variability of ERA5 kernel indeed proves this point and further comparison  
166 between ERA5 and ERAi kernel is also added in Figure 5 to compare the changes in kernel value  
167 caused by ENSO. The inter-kernel comparison does not show as much variation in the Central  
168 Pacific as in the ENSO case; this is likely because smaller temperature differences between the  
169 atmospheric datasets used for kernel calculation (e.g., Figure 5g)

170

171 ***7) After the interesting analysis showing the sensitivity of kernels to inter-annual variability***  
172 ***spatially, the feedback analysis in Section 4.2 and 4.3 mostly just focuses on global-mean***  
173 ***values. While this type of analysis is valuable in a general sense for kernel users, it doesn't***  
174 ***quite fit well with this paper, particularly because the ERA5 kernels don't stand out as being***  
175 ***more accurate or unique. Instead, I'd like to authors to focus more on multi-kernel***  
176 ***differences in the feedback spatial patterns. Given the large focus on the pattern effect and the***  
177 ***influence of regional feedbacks on the global-mean in recent years, I think that could be***  
178 ***particularly citeable. We know kernels are generally in agreement in the global-mean***  
179 ***(especially for the TOA). But what about for kernel spread in estimates of the regional***  
180 ***feedbacks?***

181

182 Following this suggestion, we used the spatial root-mean-squares (RMS) of residual terms to  
183 document the spatial biases in each kernel dataset. As indicated by the numbers in Figure 7 and  
184 9, the ERA5 kernels show relatively smaller RMS, especially for surface, compared to many  
185 other kernels. This indicates the ERA5 kernels may be more suitable for surface feedback  
186 quantification. We have clarified these points in the paper.

187

188 **8) It is tough to pick out valuable information from your tables of TOA and Surface**  
189 **feedbacks. The authors should turn those into summary figures (e.g. dot plots or scatter plots**  
190 **used by e.g. Smith et al. 2018 supplemental, or Zelinka et al. 2020) where possible.**  
191

192 Tables are moved to the Supplement and we used figure 8 and 10 to show the inter-kernel and  
193 inter-model feedback spread.  
194

195 **9) There are now many observation-based kernels in the literature from CloudSat/CALIPSO**  
196 **observations, CERES CCCM products, AIRS, and a bunch of others specific to surface albedo**  
197 **kernels that are not included in the multi-kernel analysis here. I think it's an open question**  
198 **whether these observational kernels should be included in a comparison with model-based**  
199 **kernels or not. The authors should provide a brief reason for not incorporating them (or**  
200 **should include them if they feel its appropriate), especially since the Kramer et al. and**  
201 **Thorsen et al. reference papers are cited in the text.**  
202

203 Yes, we included the CloudSat kernel for comparison in the revised manuscript.  
204

#### 205 **Specific or Minor Comments**

206 **Line 311-312 and Appendix: We discussed similar RT issues regarding the surface**  
207 **temperature kernel for surface fluxes in Kramer et al. 2019 (JCLim). The authors can cite**  
208 **and/or refer to it for some additional support. We also argued that, as noted in the author's**  
209 **current Appendix and elsewhere, similar RT issues can bias the lowest level of the surface flux**  
210 **Ta kernel in an equal and opposite manner as the Ts kernel, thereby allowing a kernel like**  
211 **CAM5 to be correct in its estimate of the vertically integrated Temperature feedback, but for**  
212 **the wrong reason. This likely explains why CAM5 and ERA5 kernels agree in Figure A2c and**  
213 **A2d. Your text somewhat gets to this point, but I'd call it out directly as a warning to kernel**  
214 **users: Some kernels may give you the correct temp. feedback for the wrong reason.**  
215 **Presumably this is true for the TOA temperature feedback too, but the contribution from the**  
216 **surface and near surface layers to that vertically integrated feedback are small, so maybe it**  
217 **doesn't matter much?**

218 **Kramer, R. J., B. J. Soden, and A. G. Pendergrass, 2019: Evaluating Climate Model**  
219 **Simulations of the Radiative Forcing and Radiative Response at Earth's Surface.**  
220 **Journal of Climate, 32, 4089– 4102, <https://doi.org/10.1175/jcli-d-18-0137.1>.**  
221

222 Following this suggestion, we added a note to caution this issue in Line 864-865.  
223

224 **Line 316-319 and more generally: Bright and O'Holloran (2019) and Donohoe et al. (2020)**  
225 **performed nice, detailed comparisons of surface albedo kernels. These papers should be cited**  
226 **and their work should be put into context of the author's own results within the present**  
227 **manuscript. This would also be useful for the section on diagnosing radiative feedback spread,**  
228 **since the authors show that the kernels give quite different results in the poles. Riihela et al.**  
229 **(2021) also did a comparison of surface albedo kernels in the context of sea ice states, and**  
230 **should be cited somewhere in the present manuscript.**

231 **Bright, R. M., and T. L. O'Halloran, 2019: Developing a monthly radiative kernel for surface**  
232 **albedo change from satellite climatologies of Earth's shortwave radiation budget: CACK**  
233 **v1.0. Geosci. Model Dev., 12, 3975–3990, <https://doi.org/10.5194/gmd-12-3975-2019>.**

234 *Donohoe, A., E. Blanchard-Wrigglesworth, A. Schweiger, and P. J. Rasch, 2020: The Effect*  
235 *of Atmospheric Transmissivity on Model and Observational Estimates of the Sea Ice*  
236 *Albedo Feedback. Journal of Climate, 33, 5743–5765, [hTps://doi.org/10.1175/jcli-d-19-](https://doi.org/10.1175/jcli-d-19-0674.1)*  
237 *0674.1.*

238 *Riihelä, A., R. M. Bright, and K. Anbla, 2021: Recent strengthening of snow and ice albedo*  
239 *feedback driven by Antarctic sea-ice loss. Nat. Geosci., 14, 832–836,*  
240 *<https://doi.org/10.1038/s41561-021-00841-x>.*

241

242 There references are now added.

243

244 *Line 316-227 and more generally: Aligning with general comment 4 above, the author’s*  
245 *assumption that clouds are the cause of the discrepancies discussed here is likely right, but*  
246 *this has been alluded to before in past work. The author’s have a unique opportunity to prove*  
247 *it directly by using the kernel’s cloud input data directly in the analysis. Using the ERA5 and*  
248 *ERAi cloud fields can the authors confirm their assumption that cloud fields matter? Or*  
249 *provide a more detailed analysis? Among all the potential sources of kernel differences, clouds*  
250 *seem to warrant deeper investigation.*

251

252 We included a comparison between ERA5 and ERAi kernel in Figure 5 and there the difference  
253 in cloud mainly leads to the difference in water vapor SW kernel as this difference only appears  
254 in all-sky (Figure 5l) but not in the clear-sky (Figure S7f).

255

256 *Figure 2f: The ERAi and ERA5 kernels are noticeably different below ~800mb. Why?*

257

258 Mainly due to the difference in water vapor and air temperature below 800hPa.

259

260 *Figure 3e and 3k: There are large standard deviations relative to the magnitude of the ERA5*  
261 *kernels at certain locations within the vertical kernel structure, but for anything above*  
262 *~950mb, the kernel magnitude is small relative to the lowermost atmospheric levels, and likely*  
263 *does not contribute much to the vertically-integrated quantity. A zoomed in version of these*  
264 *plots, highlighting the important standard deviation across kernels in the lowermost levels,*  
265 *would be informative.*

266

267 We would like to keep the current vertical range as the discrepancy in the South Pole region  
268 extents to about 300hPa.

269

270 *Figure 3f and 3l. Why is the ERAi kernel so much larger at the lowest levels near the surface*  
271 *than the ERA5 kernel (and the other kernels)? This is true for both all-sky and clear-sky.*  
272 *Could vertical resolution of the kernels be playing a role? We discuss the potential influence*  
273 *of resolution in the Appendix of Kramer et al. (2019, JCLim).*

274

275 Yes, this is due to the vertical resolution and how the air temperature perturbation is added.

276

277 *Interestingly, there is also a fairly large difference between ERA5 and ERAi in the all-sky LW*  
278 *WV kernel for surface fluxes (figure 5L), but it only shows up in the all-sky kernel, not the*  
279 *clear-sky. Does that suggest clouds matter more for the LW WV kernel in explaining*

280 *differences than they do for the LW Ta kernel, relative to other potential sources of kernel*  
281 *spread?*

282  
283 This is an interesting observation and hypothesis. The comparison however may be obscured by  
284 the averaging issues noted in the Appendix. We tried to not speculate here.

285  
286 ***Line 368: Is this the sensitivity of the surface to the vertically integrated kernel change? Only***  
287 ***the sensitivity to a certain level of WV change? It is not obvious from the figure 9 caption***  
288 ***either. Some rethinking of how the kernels are described in the text here and elsewhere would***  
289 ***be helpful. Maybe shorthand acronyms or some other naming convention would be helpful.***

290  
291 It is relative to the vertically integrated kernel. Caption is revised accordingly.

292  
293 ***Plot 9: I really like this figure. I'm not sure anyone else has shown the sensitivity of these***  
294 ***temperature and water vapor kernels to variability spatially yet. But I think it would be helpful***  
295 ***to go one step further and show what level of WV and cloud variability is impacting the***  
296 ***temporal variability of the kernels most. And does that particular level help explain the multi-***  
297 ***kernel spread in those kernels, evident in Figure 1-8? Or is inter-annual variability not***  
298 ***enough to explain the kernel spread? This comments connects with my general comment #6***  
299 ***above.***

300  
301 Following this suggestion, we added Figure S8 to show the vertical distribution of water vapor,  
302 cloud profiles and also water vapor kernels. In the ENSO case, the relatively weaker water vapor  
303 LW kernel in the Central Pacific (Figure 5e) is contributed from almost the whole troposphere  
304 (Figure S8c), possibly caused by the increase of cloud cover in the upper troposphere (Figure  
305 S8b). For the difference between ERA5 and ERAi kernel, the vertically integrated difference in  
306 water vapor SW kernel (Figure 5l) is mainly contributed from the mid-to-low troposphere  
307 (Figure S8f), which also corresponds to the discrepancies noticed in Figure 4i, and is partially  
308 due to the increase of cloud cover in mid-troposphere (Figure S8e).

309  
310 In summary, the interannual variability contribute to but does not fully explain the inter-kernel  
311 differences as shown in Figure 3 and 4, but both of them demonstrate the state-dependency of  
312 radiative kernels. We clarified these points in the paper.

313  
314  
315 ***Plot 9: The TOA SW WV kernel is a potentially interesting case where the largest multi-kernel***  
316 ***spread (tropics around 500mb in Figure 6k) sits above the level at which the ERA5 kernel is***  
317 ***the strongest (closer to 800mb in Figure 6j). Building on my comment above, how does the***  
318 ***importance of inter-annual variability play into the large kernel spread at this ~500mb level?***  
319 ***And does the spread at 500mb actually matter much for the vertically-integrated quantity?***  
320 ***This level of detail could be useful for e.g. modeling centers trying to connect TOA biases to***  
321 ***particular biases in their climate states.***

322  
323 As shown by Figure S8, it suggests that the interannual variation partly explains the  
324 discrepancies among kernel datasets. The difference of cloud field between ERA5 and ERAi  
325 suggest that the discrepancies in WV SW TOA kernel in all-sky are mainly caused by the cloud.



326  
327  
328  
329  
330  
331  
332  
333  
334  
335  
336  
337  
338  
339  
340  
341  
342  
343  
344  
345  
346  
347  
348  
349  
350  
351  
352  
353  
354  
355  
356  
357  
358  
359  
360  
361  
362  
363  
364  
365  
366  
367  
368  
369  
370  
371

**Figure 10: I struggle to see spatially where the variability in water vapor is having an effect on the kernels shown in the other subplots. Maybe only for the NE coast of Greenland? Should cloud changes be shown in this plot instead? I'd give more detailed evidence about why water vapor is important here.**

Replaced it with cloud cover.

**Line 412-419: Some explanation of why you need both abrupt4xCO2 and piCLim-4xCO2 (e.g. to remove rapid adjustments) is needed, since most people just use abrupt4xCO2 with Gregory regression to get feedbacks.**

Yes, this is to remove the rapid adjustment. Explanation was added in Line 437.

**Line 436 and Equation 5: What does the clear-sky residual term mean physically and why does it matter for computing cloud feedback? Although the author's math in Equation 6 works out to be the same as what everyone else uses, I think the way they've introduced this method, and terminology used, is less common. Some extra detail would be helpful.**

The clear-sky residual term means the unexplained part by kernel method. In adjusted cloud radiative forcing method, such a non-closure term is actually attributed to the cloud feedback.

**Line 463-464: Block and Mauritsen (2013) can be cited here for their nice discussion and analysis of the non-linearity of the surface albedo kernel in 4xCO2 runs.**  
**Block, K., and T. Mauritsen, 2013: Forcing and feedback in the MPI-ESM-LR coupled model under abruptly quadrupled CO2. J. Adv. Model. Earth Syst., 5, 676–691,**  
**<https://doi.org/10.1002/jame.20041>.**

Added.

**Last Column Table 3: The multi-model values differ somewhat across the different kernels, but not the associated standard deviations, which look to be essentially the same for all rows of the column. Does this suggest the kernels can estimate feedbacks differently in a systematic manner across all models, but they do not necessarily estimate the magnitude of the feedback spread differently? In other words, the kernel may get the model-mean feedback value wrong, but the spread in feedbacks correct? This is worth noting if so.**

As feedbacks are calculated by the product of radiative kernels ( $K_X$ ) and the anomalies ( $\Delta X$ ), when calculating the standard deviation of feedbacks among the models by the same radiative kernels, it is the variation of  $\Delta X$  among models that matters (as all models use the same  $K_X$ ) and I think that's why different kernel datasets show a close multi-model standard deviation.

**Line 487-491: Since you are not using cloud radiative kernels, the inter-kernel differences in cloud feedback must come from the difference between all-sky and clear-sky kernels (cloud masking). Can you identify which of the kernel terms is the culprit? From a related discussion see text around figs 9-11 in Kramer et al. (2019, JGR), for example.**

372 ***Kramer, R. J., A. V. Matus, B. J. Soden, and T. S. L'Ecuyer, 2019: Observation-Based***  
373 ***Radiative Kernels From CloudSat/CALIPSO. JGR Atmospheres, 124, 5431–5444,***  
374 ***<https://doi.org/10.1029/2018jd029021>.***  
375

376 In our calculation, we found that the inter-kernel differences in cloud LW feedback are almost  
377 equally contributed from Ta, Ts and WV, and in cloud SW feedback are contributed more from  
378 the albedo. As no dominant contributor or general feature is found, we chose to make no specific  
379 additional comment here.

380

381

382 ***Line 769-793: This is a really nice description of how you develop the water vapor kernel. I'd***  
383 ***highlight in the main text that you have included this section in appendix. I think many kernel***  
384 ***users and developers are looking for a description like this and will turn to it in the future.***  
385 ***There are often question about this calculation.***

386

387 We chose to keep the technical details in the appendix.

388

389
